# Supplementary material
Source: Springer Nature journal article supplement (https://www.springermedizin.de/resource/supplementary/12884_2013_1301_MOESM4_ESM.pdf/9459368)

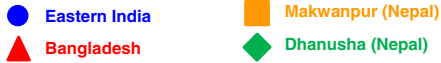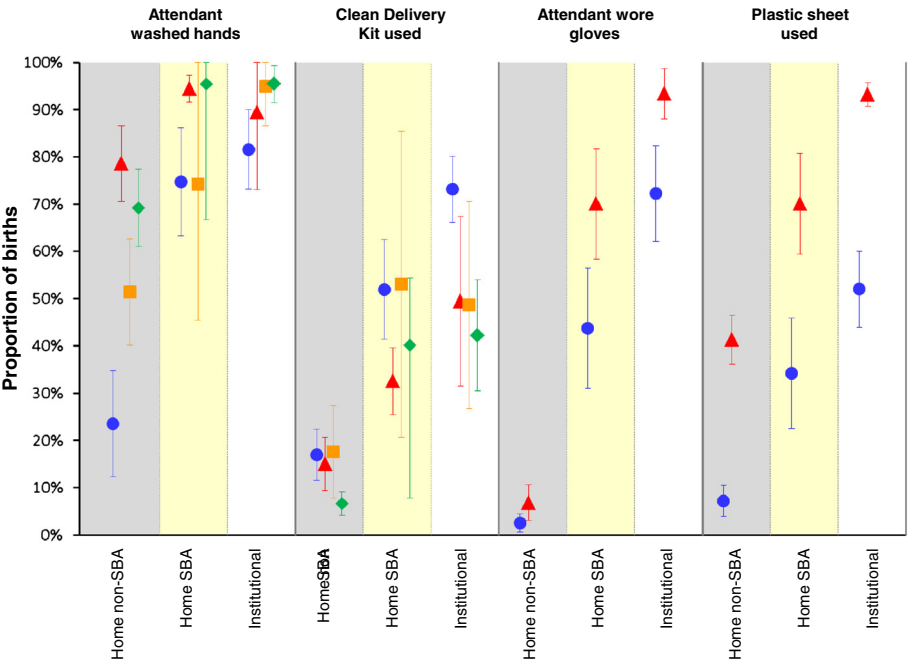

Supplement: MOESM4 [file 9459368]
